# Supplementary material for: Analysis of factors influencing hookwire dislodgement in CT-guided hookwire localization: a retrospective study using variable importance analysis with a random forest model
Source: PeerJ. 2025 Apr 16;13:e19231. doi: 10.7717/peerj.19231 (PMC12009025; doi:10.7717/peerj.19231)
Supplement: Supplemental Information 1 [file peerj-13-19231-s001.xlsx]

## Sheet: Sheet1
sex	multilocalization (yes:1)	emphysema grade (0, none; 1, mild or trace; 2, moderate; 3, confluent; 4, advanced displaced)	solid (0), PSN (1) or GGN (2)	Nodule size	Dislodgement (0: dislodged, 1: placed)	OP initiation time	OP closure time	Total depth (wall to nodule)	chest wall depth (penetrate)	muscle depth	nodule distance from pleura	nodule penetration (1, yes)	needle distance to pleura	procedure initiation time	procedure end time	gap	pneumothorax (1: yes)	hemorrhage (1:yes)
M		0	1	21	1	14:15:00	15:15:00		22	11.5	1.9	1	31	13:08:00	13:24:00	01:07:00	0	1
M		0	1	13	1	14:30:00	18:05:00	46	37	16	9	0	23	12:54:00	13:10:00	01:36:00	0	1
M		0	2	11	1	14:05:00	18:05:00	74	32	10	40	0	41	12:44:00	13:02:00	01:21:00	1	1
F		0	2	17	1	16:35:00	18:35:00	65	55	13	16	0	39	15:03:00	15:22:00	01:32:00	0	1
M		1	1	5	0	15:40:00	17:30:00	54	37	11	14	0	9	13:07:00	13:26:00	02:33:00	1	1
F		1	2	15	1	16:55:00	19:30:00	76	27	10	49	1	53	13:06:00	13:21:00	03:49:00	0	1
F		1	0	6	1	15:00:00	16:20:00	55	46	24	6	0	22	13:14:00	13:38:00	01:46:00	1	0
M		1	0	10	1	14:40:00	15:10:00	71	53	32	0	1	18	13:12:00	13:23:00	01:28:00	1	0
F		0	1	22	1	14:00:00	16:35:00	85	51	34	30	1	34	12:37:00	12:55:00	01:23:00	1	1
M		1	0	13	1	14:00:00	15:10:00	44	36	4	0	1	47	12:42:00	12:51:00	01:18:00	1	0
F		0	1	11	1	14:30:00	16:20:00	52	32	6	20	0	36	13:16:00	13:30:00	01:14:00	0	1
M		1	0	5	1	14:35:00	14:55:00	79	67	47	5	1	11	12:32:00	12:43:00	02:03:00	1	0
F		1	1	15	1	14:15:00	16:35:00	48	36	17	8	1	31	13:13:00	13:22:00	01:02:00	1	0
F		0	1	7	1	14:42:00	18:15:00	52	49	26	5	1	18	12:53:00	13:05:00	01:49:00	0	0
F	1	0	1	9	0	16:45:00	18:00:00	65	58	9	8	1	23	15:16:00	15:29:00	01:29:00	0	1
F	1	0	2	7	1	16:45:00	18:00:00	51	51	11	0	0	26	15:31:00	15:36:00	01:14:00	0	0
F		0	0	23	1	13:45:00	15:15:00	45	37	4	6	1	36	10:59:00	11:26:00	02:46:00	1	0
M		1	1	24	1	14:00:00	15:45:00	51	36	28	17	1	23	12:35:00	12:42:00	01:25:00	0	1
M		1	2	22	1	14:25:00	17:05:00	74	51	39	22	1	31	12:51:00	12:54:00	01:34:00	0	1
F		1	1	21	1	14:00:00	15:35:00	98	59	46	30	1	41	11:04:00	11:34:00	02:56:00	1	1
F		0	1	12	1	12:30:00	17:40:00	53	31	14	22	1	37	11:37:00	11:46:00	00:53:00	0	1
M		1	2	12	1	14:05:00	14:50:00	50	39	27	0	0	11	12:52:00	13:10:00	01:13:00	1	0
M		1	0	9	1	14:50:00	18:05:00	87	46	30	39	1	55	13:03:00	13:25:00	01:47:00	0	1
M		0	0	5	1	14:20:00	15:10:00	81	51	29	22	0	25	12:45:00	13:15:00	01:35:00	1	0
M		1	2	12	1	14:30:00	18:00:00	63	38	18	19	1	28	13:09:00	13:20:00	01:21:00	1	0
M		2	0	11	1	14:43:00	15:55:00	45	35	18	7	1	23	13:02:00	13:17:00	01:41:00	1	1
M		1	1	25	1	14:03:00	17:25:00	54	34	11	18	1	34	12:42:00	12:52:00	01:21:00	1	1
M		2	0	8	1	14:30:00	15:25:00	80	40	16	38	1	45	13:12:00	13:44:00	01:18:00	1	0
M		1	1	15	0	14:00:00	19:30:00	63	52	14	10	1	13	12:34:00	12:45:00	01:26:00	0	0
F		0	0	5	1	14:20:00	14:50:00	79	53	8	1	0	25	13:07:00	13:22:00	01:13:00	1	0
F		0	1	21	1	14:05:00	16:15:00	30	30	10	0	0	11	12:43:00	12:51:00	01:22:00	1	0
M		1	1	15	1	14:15:00	15:30:00	120	58	11	61	1	64	12:41:00	12:56:00	01:34:00	0	0
M		3	0	9	1	16:35:00	18:00:00	60	40	28	19	1	19	13:07:00	13:20:00	03:28:00	0	1
M		1	0	8	0	15:45:00	19:30:00	52	21	9	31	1	44	10:18:00	10:25:00	05:27:00	0	1
M		1	2	23	1	13:54:00	14:25:00	45	45	34	0	1	37	12:41:00	12:54:00	01:13:00	1	0
F		1	1	19	0	14:05:00	16:00:00	35	35	21	0	1	8	12:55:00	13:05:00	01:10:00	1	0
M		1	0	7	1	13:53:00	14:25:00	55	35	12	21	0	28	12:45:00	12:58:00	01:08:00	0	1
M		1	0	12	1	10:00:00	11:00:00	35	32	12	14	1	20	08:51:00	09:04:00	01:09:00	1	0
M		0	1	19	1	15:00:00	19:10:00	75	45	25	17	0	12	12:50:00	13:03:00	02:10:00	1	0
M		2	0	25	1	14:20:00	17:50:00	46	38	22	7	1	41	12:40:00	12:54:00	01:40:00	1	0
M		1	2	12	1	14:10:00	15:05:00	75	63	35	10	0	20	13:04:00	13:17:00	01:06:00	0	0
M		1	2	16	1	14:20:00	16:55:00	46	30	17	14	0	20	12:42:00	12:55:00	01:38:00	1	0
M		1	1	9	1	14:10:00	17:55:00	40	27	11	2	0	14	12:32:00	12:47:00	01:38:00	0	0
M		0	1	28	1	10:30:00	15:10:00	80	59	37	19	0	39	09:42:00	09:54:00	00:48:00	0	0
F		0	2	5	1	13:10:00	16:50:00	99	73	25	23	0	43	11:25:00	11:50:00	01:45:00	0	1
F		0	0	8	1	14:10:00	15:45:00	81	57	48	23	0	36	12:45:00	13:01:00	01:25:00	0	0
M		1	0	3	1	14:45:00	16:00:00	65	37	18	6	0	13	12:57:00	13:26:00	01:48:00	1	1
M		1	0	7	0	13:25:00	17:05:00	62	41	23	20	0	32	11:01:00	11:23:00	02:24:00	0	1
M		1	2	5	1	17:45:00	21:05:00	96	36	17	59	1	69	15:04:00	15:20:00	02:41:00	1	1
M		0	1	28	0	10:30:00	14:30:00	52	41	28	12	0	17	08:46:00	09:05:00	01:44:00	1	0
F		1	1	9	1	13:55:00	14:35:00	62	53	30	11	1	22	12:49:00	13:03:00	01:06:00	1	0
M		0	0	10	1	11:35:00	15:00:00	36	21	11	16	0	41	09:56:00	10:08:00	01:39:00	1	0
F		0	0	3	1	15:05:00	18:05:00	67	51	17	16	0	22	11:10:00	11:36:00	03:55:00	0	0
M		0	0	3	1	14:30:00	14:55:00	35	35	23	0	0	32	13:14:00	13:33:00	01:16:00	1	1
F		0	0	7	0	15:48:00	16:30:00	62	54	34	11	0	11	11:18:00	11:41:00	04:30:00	0	1
F		0	1	8	1	10:15:00	15:30:00	65	50	8	12	0	31	08:56:00	09:20:00	01:19:00	0	1
M		0	2	18	1	13:55:00	16:05:00	33	27	15	6	1	46	12:38:00	12:59:00	01:17:00	0	0
F		0	1	21	1	15:42:00	19:45:00	67	33	21	33	0	44	11:52:00	12:05:00	03:50:00	0	1
F		0	0	16	1	11:00:00	11:35:00	66	52	10	15	1	37	09:50:00	10:03:00	01:10:00	0	1
M		1	0	11	0	14:40:00	18:00:00	71	40	33	32	1	44	12:38:00	13:08:00	02:02:00	0	1
F		0	1	10	1	14:05:00	16:15:00	74	66	49	7	0	22	12:53:00	13:02:00	01:12:00	1	0
M		0	0	7	1	13:30:00	14:00:00	40	35	20	5	0	15	11:12:00	11:32:00	02:18:00	0	1
M		0	0	7	1	14:15:00	15:05:00	39	28	6	9	1	25	13:03:00	13:13:00	01:12:00	0	0
M		2	0	12	1	13:58:00	14:55:00	39	32	7	5	1	28	12:46:00	12:54:00	01:12:00	0	0
F		0	0	10	1	14:55:00	15:20:00	44	34	6	3	0	21	11:31:00	11:46:00	03:24:00	1	0
M		1	0	10	1	14:10:00	18:45:00	37	37	14	0	0	42	13:13:00	13:39:00	00:57:00	1	0
F		0	0	18	1	12:27:00	13:35:00	55	39	16	16	0	45	09:22:00	09:42:00	03:05:00	1	1
M		1	0	5	1	13:50:00	14:15:00	51	44	21	6	1	34	12:45:00	12:57:00	01:05:00	1	1
M		0	0	8	1	13:46:00	15:30:00	51	23	15	32	0	55	12:26:00	12:46:00	01:20:00	1	0
F		1	2	7	1	14:11:00	16:05:00	47	42	25	1	1	20	12:43:00	13:02:00	01:28:00	0	0
F		0	0	11	0	14:35:00	16:35:00	45	22	13	22	1	47	12:58:00	13:20:00	01:37:00	0	1
M		0	0	10	1	17:00:00	17:40:00	68	60	39	4	0	34	15:07:00	15:15:00	01:53:00	1	0
M		1	2	28	1	14:30:00	15:50:00	122	63	38	56	1	60	12:45:00	13:01:00	01:45:00	1	0
F		0	2	5	1	16:20:00	16:50:00	50	42	19	6	1	12	12:56:00	13:14:00	03:24:00	1	0
M		1	0	5	1	15:40:00	16:35:00	82	43	30	33	0	37	12:41:00	12:59:00	02:59:00	1	1
M		0	0	14	1	14:55:00	17:35:00	66	35	10	22	1	38	12:57:00	13:11:00	01:58:00	1	0
M		0	0	3	1	15:10:00	15:55:00	68	51	13	16	0	25	12:54:00	13:31:00	02:16:00	1	1
F		1	0	4	1	14:25:00	15:30:00	42	38	4	4	1	13	13:10:00	13:27:00	01:15:00	0	0
F		0	0	9	1	19:37:00	22:35:00	65	29	10	35	1	56	15:12:00	15:22:00	04:25:00	0	0
F		0	1	21	1	14:33:00	16:45:00	66	56	21	6	1	27	12:39:00	13:03:00	01:54:00	0	0
F		1	0	13	1	14:10:00	14:40:00	66	44	20	21	0	36	12:53:00	12:58:00	01:17:00	1	1
M		0	0	11	1	14:10:00	16:25:00	70	33	12	35	0	35	12:32:00	12:43:00	01:38:00	0	1
F		0	0	8	1	16:30:00	17:30:00	77	39	12	38	0	73	12:53:00	13:17:00	03:37:00	0	1
M		0	1	12	1	14:50:00	18:05:00	36	26	11	8	1	41	12:35:00	12:46:00	02:15:00	1	1
M		1	0	3	1	14:25:00	15:20:00	52	30	7	21	1	34	12:53:00	13:04:00	01:32:00	1	0
F	1	0	1	14	1	15:00:00	17:15:00	66	53	26	12	1	27	12:48:00	13:13:00	02:12:00	1	0
F	1	0	2	5	0	15:00:00	17:15:00	82	64	39	14	0	9	13:15:00	13:30:00	01:45:00	1	0
F		1	0	6	1	13:55:00	15:40:00	71	28	18	41	0	51	12:47:00	13:09:00	01:08:00	0	0
M		0	0	8	1	14:40:00	15:55:00	84	31	8	31	0	48	12:58:00	13:12:00	01:42:00	1	1
F		0	0	9	1	14:15:00	16:05:00	82	44	9	36	1	39	12:37:00	12:56:00	01:38:00	1	0
M		1	0	11	1	14:20:00	16:30:00	46	45	30	2	1	13	12:45:00	12:59:00	01:35:00	0	1
F		0	2	8	1	14:05:00	18:20:00	29	25	5	1	1	11	12:42:00	12:48:00	01:23:00	0	0
F		1	1	18	1	13:35:00	18:30:00	94	53	29	42	0	47	12:20:00	12:34:00	01:15:00	1	0
M		0	0	13	1	14:40:00	15:50:00	91	51	29	42	0	47	12:45:00	13:31:00	01:55:00	0	1
F		0	1	24	0	15:00:00	18:20:00	84	43	13	42	1	51	13:09:00	13:12:00	01:51:00	1	1
F		0	0	6	1	14:40:00	15:50:00	39	23	4	16	1	26	13:19:00	13:33:00	01:21:00	0	1
M	1	1	0	5	1	14:45:00	16:50:00	63	52	33	11	0	29	13:15:00	13:25:00	01:30:00	1	1
M	1	1	0	18	1	14:45:00	16:50:00	55	45	21	2	1	23	13:04:00	13:12:00	01:41:00	1	0
M		3	0	9	1	14:20:00	15:10:00	49	41	18	6	1	33	13:01:00	13:12:00	01:19:00	1	0
F		0	0	3	1	14:45:00	15:55:00	41	29	4	11	1	36	13:03:00	13:27:00	01:42:00	0	1
F	1	0	0	7	1	15:15:00	16:30:00	61	49	22	13	1	36	13:12:00	13:25:00	02:03:00	0	1
F	1	0	0	5	0	15:15:00	16:30:00	47	43	7	6	0	11	12:27:00	13:44:00	02:48:00	0	0
M		1	0	8	1	15:00:00	15:50:00	28	21	11	5	1	10	12:37:00	12:46:00	02:23:00	1	0
M		1	0	9	1	13:55:00	14:55:00	69	38	15	29	0	38	12:42:00	12:56:00	01:13:00	1	0
F		1	1	15	1	13:50:00	14:45:00	38	38	18	0	1	27	12:41:00	12:54:00	01:09:00	0	0
M		1	2	6	1	17:00:00	17:35:00	91	61	38	9	1	14	15:39:00	15:55:00	01:21:00	1	0
M		1	2	10	1	14:00:00	19:45:00	57	49	22	8	0	21	12:44:00	13:00:00	01:16:00	0	0
F		0	2	13	1	14:05:00	15:45:00	52	36	17	13	0	16	12:44:00	12:58:00	01:21:00	0	0
F		0	0	9	1	13:30:00	13:50:00	26	21	5	2	1	13	12:19:00	12:28:00	01:11:00	0	1
F		0	0	6	0	14:10:00	14:45:00	46	32	3	11	0	29	12:53:00	13:02:00	01:17:00	0	1
F		0	0	11	1	13:03:00	13:30:00	37	34	4	0	0	29	11:52:00	12:07:00	01:11:00	1	1
F	1	0	0	16	1	14:35:00	15:15:00	48	39	15	1	0	13	13:00:00	13:06:00	01:35:00	0	0
F	1	0	0	8	1	14:35:00	15:15:00	77	61	27	0	0	10	13:11:00	13:28:00	01:24:00	1	0
M		1	0	12	1	16:35:00	18:05:00	61	31	24	29	0	36	12:20:00	12:34:00	04:15:00	0	1
M		3	0	8	1	14:34:00	15:05:00	55	42	29	17	0	39	12:59:00	13:19:00	01:35:00	0	0
M	1	0	1	30	1	14:00:00	16:50:00	83	63	36	18	0	15	12:46:00	12:56:00	01:14:00	0	0
M	1	0	1	16	0	14:00:00	16:50:00	56	43	27	12	0	21	12:31:00	12:41:00	01:29:00	0	0
F		0	1	10	1	13:50:00	15:10:00	38	23	17	13	0	30	12:38:00	12:42:00	01:12:00	0	1
M		0	0	7	1	13:40:00	14:00:00	51	46	16	7	0	17	12:34:00	12:45:00	01:06:00	0	0
M		0	0	6	1	14:20:00	15:15:00	68	32	3	37	0	55	12:56:00	13:03:00	01:24:00	0	0
F		1	1	28	1	14:05:00	17:23:00	61	35	7	25	1	34	12:47:00	12:55:00	01:18:00	1	0
M		2	0	7	1	13:50:00	18:40:00	53	38	15	12	1	16	12:33:00	12:40:00	01:17:00	0	0
M		1	0	7	1	15:10:00	17:10:00	47	22	4	24	1	58	12:43:00	12:53:00	02:27:00	1	1
